# Supplementary material for: PIK3CA-AKT pathway predominantly acts in developing ipsilateral breast tumor recurrence long after breast conserving surgery
Source: Research Square preprint supplement (doi:10.21203/rs.3.rs-1310576/v1), 2022-02-03
Supplement: Supplementary file 1 [file 31f0c5a2184f120159052395.xlsx]

## Sheet: Table34修正 (２)
			Table 2b. Genomic Profile of 8 gDP cases
			Cases		gDP1		gDP2		gDP3		gDP4		gDP5		gDP6		gDP7		gDP8
			T1(PBC) T2,T3(IBTR)		T1	T2	T1	T2	T1	T2	T1	T2	T1	T2	T1	T2	T1	T2	T1	T2
			Interval (Year)		4		6		8		10		10		11		15		17
			Distant meta.
			Subtype	HR pos.
				Her2 pos.
				Both neg.
			Pathway	Gene
			PI3K/AKT /RAS
			PIK3CA							39		29	23
			PIK3CA*											28
			NF1						3
			TP53/Cell Cycle /DNA damege
			TP53															10
			RB1																	73
			BRCA2																	51
			Chromatin Remodeling/ Epigenetic Chromatin
			KMT2C											24	24
			Transcriptional Regulation
			RUNX1		42
			GATA3					44											24
			MED12								3						4
			MED12*														4
			NCOR1						29
			CBFB										30
			Splicing
			Wnt/b catenin
			CDH1												42
			Others
			Number of Oncogenic mutations		1	0	0	1	2	1	1	1	2	2	2	0	2	1	1	2
			* PIK3CA* and MED12* are another variants of same sample
