# Supplementary material for: PIK3CA-AKT pathway predominantly acts in developing ipsilateral breast tumor recurrence long after breast conserving surgery
Source: Research Square preprint supplement (doi:10.21203/rs.3.rs-1310576/v1), 2022-02-03
Supplement: Supplementary file 6 [file 66f3065ca0bfc65f2a833312.xlsx]

## Sheet: 1881vs52vs22 (追加)
					Table 1. Clinical Features															0.379739
						①Total case of BCS	②Total case of IBTR	③DNA analyzed IBTR	P-values (① vs ②)	P- values (② vs ③)		④ gRR	⑤ gDP	P-value (④ vs ⑤)
					Number of Cases	1881	52	22				14	8
					Age	58±13	54±12	47±9	0.51	0.01		49±11	43±5	0.21						19.725	12.9389
					PBC															16.7889	11.2139
					Tis/T1/T2/T3	301/974/567/39	8/24/19/1	2/13/7/0	0.81	0.74		1/7/6/0	1/6/2/0	0.79						15.475	11.0167
					LN meta. negative/positive/unknown	1537/340/4	41/9/2	17/5/0	0.10	0.49		10/4/0	7/1/0	0.74						12.9389	9.99722
					Stage 0/1/2/3/4	295/867/594/122/3	8/19/23/2/0	2/10/9/1/0	0.61	0.84		1/5/7/1/0	1/5/2/0/0	0.67						11.3889	5.40278
					Histology & Subtypes															11.2139	6.5
					DCIS/IDC/ILC/Others	301/ 1434 /45/101	8/41/2/1	2/19/1/0	0.344	0.87		1/12/1/0	1/7/0/0	0.87						11.0167	5.89444
					HR pos./Her2 pos./Both neg.	1490/202/162/(unknown 27)	36/10/6	19/3/0	0.28	0.22		11/3/0	8/0/0	0.37						9.99722	3.22222
					IBTR															3.22222	6.39167
					Interval year from PBC to IBTR	na	7.7±4.6	8.4±4.0	na	0.53		7.5±3.7	9.9±4.3	0.21						8.65278	4.58889
					(range)		(0.9-19.7)	(2.7-16.5)				(2.7-14.2)	(3.3-16.5)							8.38333	4.22222
					Tumor Tis/T1/T2/T3	na	4/34/13/1	0/17/5/0	na	0.48		0/11/3/0	0/5/3/0	0.58						8.28889	2.77778
					Histology DCIS/IDC/ILC/others	na	4/45/2/1/0	0/21/1/0	na	0.4		0/13/1/0	0/8/0/0	0.9						8.27778	3.25278
					Subtype Hrpos./Her2pos./Both neg.	na	31/11/10	16/3/3	na	0.56		11/3/0	5/0/3	0.03						7.37778	16.5528
					cRR /cDP		40/12	13/9	na	0.12		11/3	2/6	0.01		31/11/10	16/3/3			7	10.1083
					Anatomical Concordance	na	41(79%)	13(59%)	na	0.14		11(79%)	2(25%)	0.01		40/12	13/9			6.60278	8.14167
					Histological Concordance	na	43(83%)	19(86%)	na	0.96		14(100%)	5(63%)	0.01						15.0778
					PBC; Primary Breast Cancer IBTR; Ipsilateral Breast Tumor Recurrence															9.31667
					cRR /cDP; clinical Residual Recurrence/clinical Double Primary															4.70833
					DCIS; Ductal carcinoma in situ, IDC; Invasive ductal carcinoma, ILC; Invasive lobular carcinoma															4.63889
					na; not aplicable															6.39167
					p values were calculated by t test or χ２ test as appropriate															4.60833
																				4.38333
																				4.58889
																				3.75833
																				3.62222
																				4.22222
																				3.21944
																				3.03611
																				2.77778
																				2.08889
																				1.75278
																				0.475
																				3.25278
																				16.5528
																				14.9
																				10.1083
																				8.14167
																				12.6111
																				3.35
																				2.29167
																				0.922222
