# Supplementary material for: PIK3CA-AKT pathway predominantly acts in developing ipsilateral breast tumor recurrence long after breast conserving surgery
Source: Research Square preprint supplement (doi:10.21203/rs.3.rs-1310576/v1), 2022-02-03
Supplement: Supplementary file 7 [file 7fa92ee79b9a5e43974c1b80.xlsx]

## Sheet: Table34修正 (２)
	Table 2a. Genomic Profile of 14 gRR cases
	Case		gRR1		gRR2		gRR3		gRR4		gRR5		gRR6		gRR7		gRR8		gRR9		gRR10		gRR11		gRR12		gRR13		gRR14
	T1(PBC) T2(IBTR)		T1	T2	T1	T2	T1	T2	T1	T2	T1	T2	T1	T2	T1	T2	T1	T2	T1	T2	T1	T2	T1	T2	T1	T2	T1	T2	T1	T2
	Interval (Year)		3		3		4		5		5		5		6		7		8		10		11		11		13		14
	Distant meta.				●		●																●		●
	Subtype	HR pos.
		Her2 pos.
		Both neg.
	Pathway	Gene
	PI3K/AKT /RAS
	PIK3CA		13	26	25	43					20	29	36	31							29	16	31	37			21	25	19	20
	AKT1														56	54	22	43
	PTEN																		34	26					11	59
	PTEN*																		28	35					12
	NF1																				29	18
	TP53/Cell Cycle /DNA damege
	TP53			31	21	40			50	48	36	41											36	43
	RB1																				6
	ATR																										4
	Chromatin Remodeling/ Epigenetic Chromatin
	KMT2D						12																				16
	KMT2C														22	23										38
	ARID1A																				6
	Transcriptional Regulation
	MED12																	3			17						6
	FOXA1																										86
	SMAD4					3
	NCOR1																				7				12
	Splicing
	Wnt/b catenin
	CDH1														38	27
	Others
	PTPRD#						3	9
	Number of Oncogenic mutations		1	2	2	3	1	0	1	1	2	2	1	1	3	3	1	2	2	2	6	2	2	2	3	2	5	1	1	1
		# PTPRD are excluded because it was not oncogenic
		* PTEN* is an another variant seen in the same sample.
