# Supplementary material for: PIK3CA-AKT pathway predominantly acts in developing ipsilateral breast tumor recurrence long after breast conserving surgery
Source: Research Square preprint supplement (doi:10.21203/rs.3.rs-1310576/v1), 2022-02-03
Supplement: Supplementary file 8 [file 83abcb25fbaf6b4da53dc3df.xlsx]

## Sheet: Sheet1
	sTable 1. “Breast Cancer Panel” including 53 genes of 6 major pathways
	TP53/Cell Cycle/DNA damege
		TP53	ATM	ATR	BRCA1	BRCA2	CCND1	CDKN1B	CDKN2A	RB1
	Chromatin Remodeling/ Epigenetic
		ARID1A	ARID1B	ARID2	BAP1	KMT2D	MLL3	SETD2	SMARCD1
	Transcriptional Regulation
		ASXL1	CBFB	CTCF	ESR1	FOXA1	GATA3	MYC	MED12	NCOR1
		RUNX1	TBX3	SMAD4
	PI3K/AKT/RAS
		AKT1	AKT2	ERBB2	FGFR1	KRAS	MAP2K4	MAP3K1	MAP3K13	NF1
		PIK3CA	PIK3R1	PTEN	STK11
	Splicing		AFF2	SF3B1
	Wnt/b catenin		APC	CDH1
	Others		AGTR2	CASP8	LDLRAP1	MYH9	PTPN22	PTPRD	STMN2
