# Supplementary material for: PIK3CA-AKT pathway predominantly acts in developing ipsilateral breast tumor recurrence long after breast conserving surgery
Source: Research Square preprint supplement (doi:10.21203/rs.3.rs-1310576/v1), 2022-02-03
Supplement: Supplementary file 9 [file d99977fe80c5f8e6e6038ae9.xlsx]

## Sheet: Table3
	Table 3. Number of patients with oncogenic mutations of each pathway in T1 and T1+T2
			T1 (PBC)				T2 (IBTR)				T1+T2
			gRR	gDP	P-value		gRR	gDP	P-value		gRR	gDP	P-value
	Pathways		n=14(%)	n=8(%)			n=14(%)	n=8(%)			n=28(%)	n=16(%)
	PI3K/AKT /RAS		12(86)	2(25)	0.004		12(86)	3(28)	0.02		24(86)	5(31)	<0.001
	TP53/Cell Cycle/DNA damage		6(43)	0(0)	0.03		5(36)	2(30)	0.6		11(39)	2(13)	0.06
	Chromatin Remodeling / Epigenetic Chromatin		4(29)	1(13)	0.38		2(14)	1(16)	0.9		6(21)	2(13)	0.46
	Transcriptional Regulation		3(21)	5(63)	0.054(ns)		2(14)	2(26)	0.53		5(18)	7(44)	0.06
	Splicing		0(0)	0(0)	na		0(0)	0(0)	na		0(0)	0(0)	na
	Wnt/b catenin		1(7)	1(16)	0.64		1(7)	0(0)	0.44		2(7)	1(6)	0.91
	Others		0*(0)	0(0)	na		0(0)	0(0)	na		0(0)	0(0)	na
	Mean Number of oncogenic mutation		2.2±1.6	1.3±0.7	0.11		1.7±0.8	1±0.6	0.06		2.0±1.3	1.2±0.8	0.03
	* PTPRD is excluded because of non-oncogenic mutation
